# Supplementary material
Source: publisher figshare collection journal article supplement (https://frontiersin.figshare.com/ndownloader/files/12461048)
Supplement: Supplementary file [file 12461048]

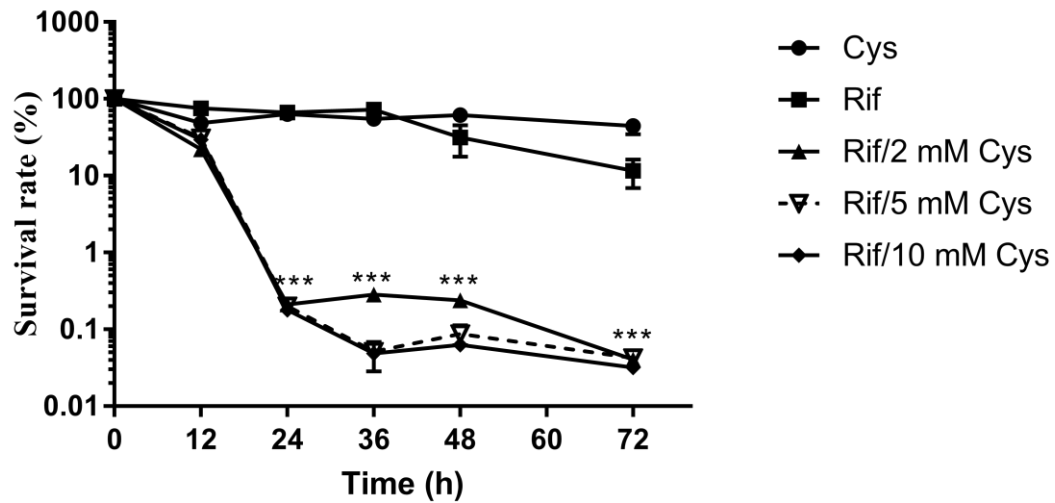

**Supplement Figure 1.** Cysteine synergizes with rifampicin against starved *M. smegmatis* strains. Starved strains treated with rifampicin and cysteine (2mM, 5mM, 10mM) for 0h-72h. Aliquots were taken at the indicated times and plated to determine CFUs. The data are shown as means  $\pm$  SD of triplicate wells. The similar results were obtained in three independent experiments. Values were compared with the control (without cysteine). Statistical analysis was performed using GraphPad Prism 6.0. The results were compared by Student's *t* test. Differences were considered statistically significant with \*\*\* $P < 0.001$ . Error bars represent standard deviation of the mean. Rif, rifampicin; Cys, cysteine.
